# Supplementary material for: Differently Shaped Au Nanoparticles: A Case Study on the Enhancement of the Photocatalytic Activity of Commercial TiO2
Source: MDPI journal article supplement (doi:10.3390/ma8010162), 2014-12-31
Supplement: s1 [file s1]

## Supplementary materials

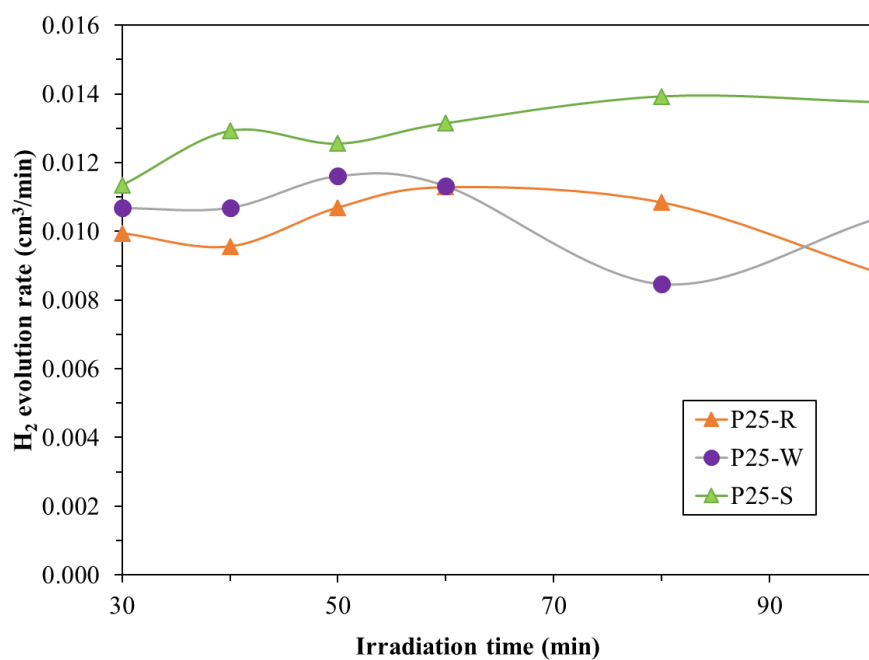

**Figure S1.** H<sub>2</sub> production rate using oxalic acid as sacrificial agent and selected P25-Au-based composites as photocatalysts.

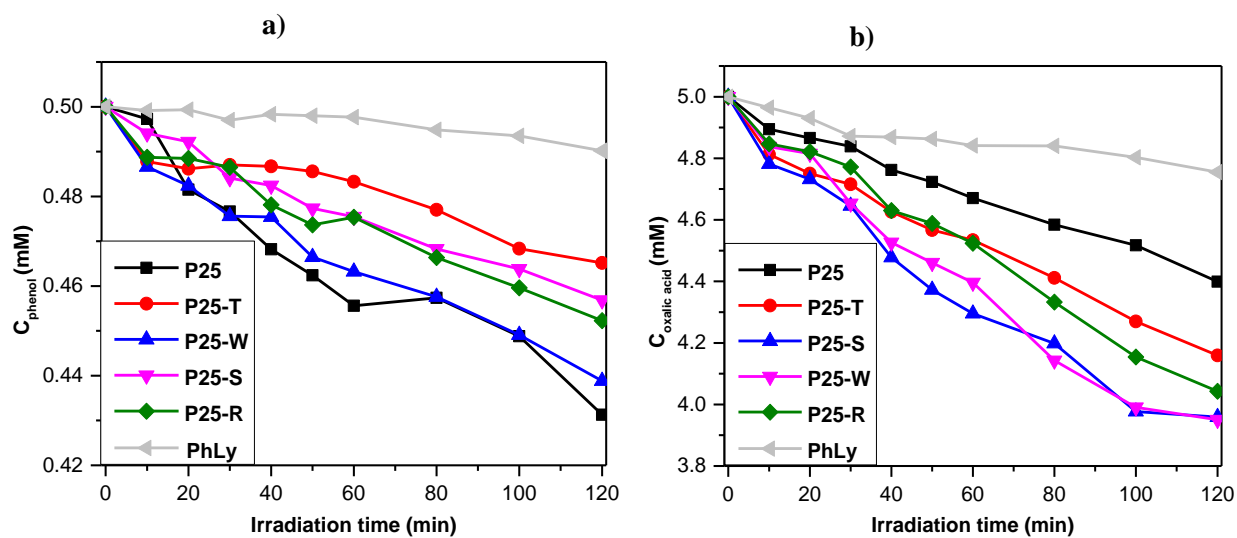

**Figure S2.** Degradation curves for phenol (a) and oxalic acid (b) of the prepared nanocomposites under Vis irradiation (PhLy refers to the degradation without photocatalyst).
